# Supplementary material
Source: MDPI journal article supplement (https://www.mdpi.com/1996-1073/16/2/786)
Supplement: s1 [file s1]

Supplementary Materials

# Influence of Cr doping on structural, optical, and photovoltaic properties of BiFeO<sub>3</sub> synthesized by sol-gel method

José Tiburcio <sup>1</sup>, Elisban Sacari <sup>1,2\*</sup>, Jesús Chacaltana<sup>1</sup>, Jesús Medina <sup>2</sup>, Francisco Gamarra <sup>2</sup>, Carlos Polo <sup>1</sup>, Efracio Mamani<sup>1</sup> and Alberto Quispe<sup>3</sup>

<sup>1</sup> Departamento de Física Aplicada, Universidad Nacional Jorge Basadre Grohmann, Avenida Miraflores S/N, Ciudad Universitaria, Tacna 23003, Peru

<sup>2</sup> Laboratorio de Nanotecnología, Facultad de Ingeniería, Universidad Nacional Jorge Basadre Grohmann, Avenida Miraflores S/N, Ciudad Universitaria, Tacna 23003, Peru

<sup>3</sup> Departamento de Metalurgia y Materiales, Universidad Nacional Jorge Basadre Grohmann, Avenida Miraflores S/N, Ciudad Universitaria, Tacna 23003, Peru

\* Correspondence: esacaris@unjbgr.edu.pe; Tel.: +51-925573684

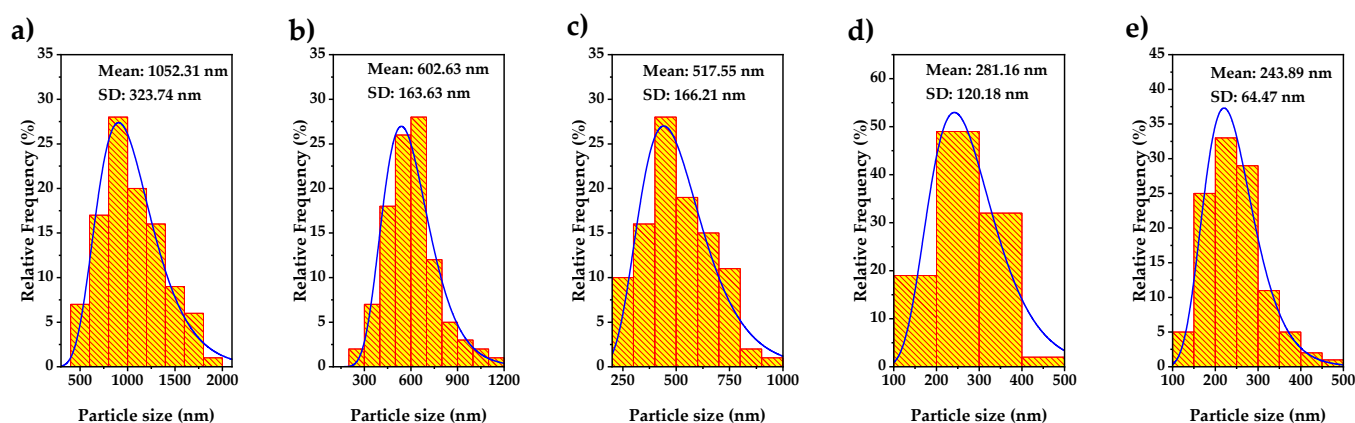

**Figure S1.** Particle size distribution of a) Pure BiFeO<sub>3</sub>, b) BiFeO<sub>3</sub> -1% Cr, c) BiFeO<sub>3</sub> -3% Cr, d) BiFeO<sub>3</sub> -5% Cr and e) BiFeO<sub>3</sub> -10% Cr

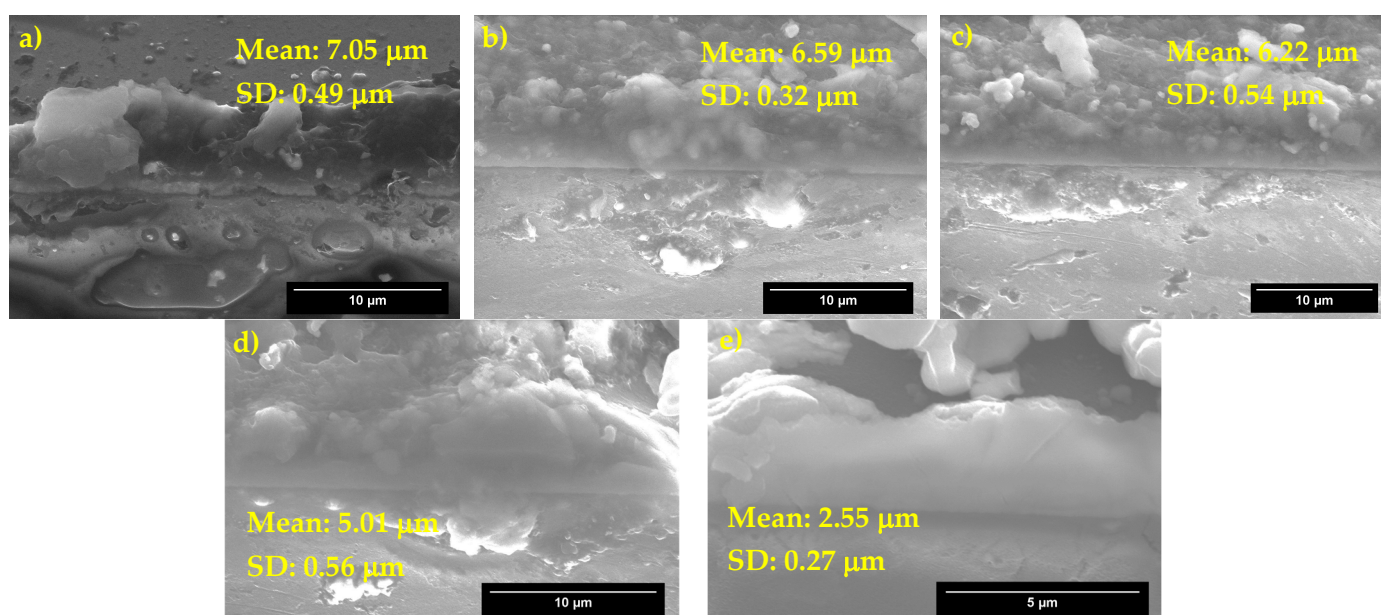

**Figure S2.** Electrode Thickness of a) Pure BiFeO<sub>3</sub>, b) BiFeO<sub>3</sub> -1% Cr, c) BiFeO<sub>3</sub> -3% Cr, d) BiFeO<sub>3</sub> -5% Cr and e) BiFeO<sub>3</sub> -10% Cr Solar cell
